# Supplementary material
Source: publisher site journal article supplement (https://www.degruyterbrill.com/publication/isbn/9783110334739/downloadAsset/9783110334739_Inhaltsverzeichnis.pdf)
Supplement: Supplementary file 1 [file 9783110334739_Inhaltsverzeichnis.pdf]

# Inhalt

**Geleitwort — 1**

**Vorwort – Die deutsche Sprache ist wie sie ist — 5**

Wolfgang Klein

**Von Reichtum und Armut des deutschen Wortschatzes — 15**

Peter Eisenberg

**Anglizismen im Deutschen — 57**

Ludwig M. Eichinger

**Die Entwicklung der Flexion: Gebrauchsverschiebungen,  
systematischer Wandel und die Stabilität der Grammatik — 121**

Angelika Storrer

**Variation im deutschen Wortschatz am Beispiel  
der Streckverbgefüge — 171**

## **Anhang**

Barbara Seelig

**Zu Datengrundlage und Datenbearbeitung — 213**
